# Supplementary material
Source: publisher figshare collection journal article supplement (https://frontiersin.figshare.com/ndownloader/files/22688183)
Supplement: Supplementary file 1 [file 22688183]

***Appendix A: Protocol for the systematic review***

This review followed the protocol for systematic reviews developed for social (Maki *et al*., 2018) and health sciences (Li *et al.,* 2015; Singh, 2017), the second of the two fields being the one within which this method has been long established (Ford *et al*., 2011). This protocol includes the following stages: search eligibility criteria, search results screening and data abstraction, risk bias assessment, and data synthesis and analysis. A PRISMA diagram illustrating the undertaken steps can be found in Fig. 1.

**Search eligibility criteria**

To identify the decisions linking to the climate change impacts within the various decision making contexts across the European cultivating olive, grape, and durum wheat areas, we searched for recent peer reviewed and grey (books and book sections, and European project reports), between 2000 and 2019, in English, carried out in Europe, on both specialized (Web of Science Core Collection/Social Sciences Citation Index (SSCI); SCOPUS**/** E-databases/[Social Sciences](http://lib.leeds.ac.uk/search~S4?/dE-databases+--+Social+Sciences+--+Sociology%2FSocial+Policy/de+databases+social+sciences+sociology+social+policy/-3,-1,0,B/browse) ; PROQUEST/Applied Social Sciences Index & Abstracts (ASSIA); SCIENCE DIRECT/Social Sciences and Humanities/Social Sciences; SAGE JOURNALS/Social Sciences & Humanities) and non-specialized databases (CORDIS, Open Science Framework, Google Scholar). The choice of topics within the specialized databases, falling in the area of social sciences, was driven by the need to produce knowledge on types of stakeholders and types of climate-related decisions more than by identification of the three crops’ responses to climate change impacts. Therefore, all the other topics, including Science Citation Index Expanded (SCI-EXPANDED) within Web of Science Core Collection, which comprise more technical publications, were excluded. Other exclusion criteria included non-English literature, published before 2000, all other types of publications except the included ones.

The following combinations of key topic terms were used, to search for literature related to all the derivations of the truncated search terms: “climat*”, AND one of the followings: ”grape”, “vine”, “durum wheat”, “oliv*” AND “Europ*”. The derivations of the truncated words were checked with CAB Thesaurus (Anonymous, 2018*a*).

By using “AND” Boolean operator, we narrowed down the search, as this operator requires to be included at least one search term from the lists given on each side of the operator (Anonymous, 2018*b*).

**Search results screening and data abstraction**

The initial search retrieved a number of 1753 peer-reviewed articles and grey documents. The titles, abstracts and key words of the search results were screened according to the eligibility criteria (Maki *et al.,* 2018). There were identified and retained 80 studies, including peer-reviewed and grey literature, for data abstraction phase. Among the retained ones, 54 referred directly to changes in agricultural decisions influenced by the identified impacts of climate change. The remaining 26 referred more to impacts of climate changes influencing the identified decisions for the cropping systems of interest (olive, grape, durum wheat).

After screening and study identification, key data were abstracted into individual data abstraction forms (Table 1). All the forms were centralized in one single centralized Excel form including the data for all the abstracted studies. The centralized data abstraction form documented general and specific information to be further used in data analyses (Li *et al*., 2015).

**Table 1.** **Data abstraction form for identifying expected decisions across European olive, grape, and durum wheat cropping systems**

| **Types of data abstracted from individual studies** |
| --- |
| **General information:**  **Name** of data abstractor:  **Version number**:  **Date** of data abstraction: |
| **Study/publication characteristics:**  **Title/year/author(s)**  **Type** (review or research paper)  **Addressed research gap(s)**  **Aim or objectives** of the study/publication  **Study design**:  Region(s) and country/countries from which study participants were recruited  Recruitment and sampling procedures  Sample size  Start and end dates  Level of addressing the identified research gap(s) |
| **Identified independent variable(s):** Olive/Grape/Durum wheat cropping system/Common to all cropping  systems |
| **Identified dependent variable(s):** Expected climate change impacts  Expected climate-related decisions |
| **Confounding variables or effect modifiers**: politico-historic-economic context and policy context (in case of  significant differences among EU and non-EU countries) |

(Adapted from Li *et al.,* 2015)

**Risk bias assessment**

We performed critical assessment of study quality, through a combination of identified factors that may bias review output.

For this systematic review, we took into consideration the following types of biases:

- Biases (systematic errors) in the search strategy, which may affect the search outcomes operator (Anonymous, 2018*b*);
- Possible publication bias, where ‘positive’ (i.e. confirmative, statistically significant) results are more likely to be published in academic journals rather than in grey literature operator (Anonymous, 2018*b*);
- Confounding during data abstraction process **(**Viswanathan *et al.,* 2012; Li *et al*., 2015).

We attempted to minimize biases in the search strategy and publication bias by:

1. looking for evidence outside traditional academic electronic bibliographic sources (Open Science Framework, Google Scholar, and CORDIS), as well as in non-peer-reviewed sources (books and book chapters, and European project reports);
2. using multiple specialized databases to reduce the possibility of bias in the retrieved results (Maki *et al.,* 2018).

We attempted to minimize confounding during data abstraction process by identification of potential factors which might be potential confounding variables or effect modifiers (i.e., correlated with other factors) (Singh, 2017). The following potential confounding variables or effect modifiers were considered and recorded in the review (Table 1):

- politico-historic-economic context (in case of significant differences among EU and non-EU countries), which could have a strong influence on decision making while reducing the effects of climate variability and change (Bert *et al.,* 2006);
- policy context (in case of significant differences among EU and non-EU countries). The reason for considering the policy context as a modifier is that it tends to reduce the overall value of using the climate information by regulating the choice of crops and cultural practices (Cabrera *et al.,* 2007).

**Data synthesis and analysis**

The climate change impacts and critical climate related-decisions identified for the three crops (olive tree, grapevine, and durum wheat) and associated products (olive oil, wine, and pasta) were encoded as nodes in NVIVO (QSR International Pty Ltd., 2014) and grouped into types of climate change impacts and associated decisions, by running several queries for the three cropping systems.

Cluster analysis (i.e. classification of a sample of subjects (or objects) on the basis of a set of measured variables into a number of different groups such that similar subjects are placed in the same group; StatSoft, Inc., 2013) was performed for the NVIVO nodes to help us identify common climate change impacts and climate-related decisions across the three crops of interest to this study.
